# Supplementary material for: Effects of Selected Essential Oils on Listeria monocytogenes in Biofilms and in a Model Food System
Source: MDPI journal article supplement (doi:10.3390/foods12101930), 2023-05-09
Supplement: s1 [file s1]

## Supplementary Materials

**Table S1.** List of essential oils, their origin and expiration date.

| No. | Essential Oils    | Latin Name                        | Origin    | Expiration date |
|-----|-------------------|-----------------------------------|-----------|-----------------|
| 1.  | Basil             | <i>Ocimum basilicum</i>           | India     | 06.06.2019.     |
| 2.  | Black pepper      | <i>Piper nigrum</i>               | India     | 22.12.2018.     |
| 3.  | Cassumunar ginger | <i>Zingiber cassumunar</i>        | India     | 31.10.2019.     |
| 4.  | Cinnamon          | <i>Cinnamomum zeylanicum nees</i> | Sri Lanka | 31.10.2019.     |
| 5.  | Clove             | <i>Syzygium aromaticum L.</i>     | India     | 30.11.2019.     |
| 6.  | Curry plant       | <i>Helichrysum italicum</i>       | India     | 28.02.2020.     |
| 7.  | Fennel            | <i>Foeniculum vulgare</i>         | India     | 31.03.2020.     |
| 8.  | Garden angelica   | <i>Angelica archangelica</i>      | Serbia    | 08.2019.        |
| 9.  | Hyssop            | <i>Hyssopus officinalis</i>       | Serbia    | 07.2021.        |
| 10. | Lavender          | <i>Lavandula angustifolia</i>     | India     | 29.09.2020.     |
| 11. | Lemon             | <i>Citrus limonum</i>             | India     | 28.02.2020.     |
| 12. | Myrtle            | <i>Myrtus communis</i>            | India     | 22.12.2018.     |
| 13. | Oregano           | <i>Origanum vulgare</i>           | India     | 28.02.2020.     |
| 14. | Rosemary          | <i>Rosmarinus officinalis</i>     | Spain     | 30.11.2019.     |
| 15. | Sage              | <i>Salvia officinalis</i>         | India     | 29.09.2020.     |
| 16. | Thyme             | <i>Thymus vulgaris</i>            | India     | 07.2019.        |
| 17. | Winter savory     | <i>Satureja montana</i>           | Serbia    | 07.2020.        |
| 18. | Yarrow            | <i>Achillea millefolium</i>       | Serbia    | 10.2020.        |

**Table S2.** Chemical compositions (%) of the essential oils of basil (EO1), black pepper (EO2), cassumunar ginger (EO3), cinnamon (EO4), clove (EO5), and curry plant (EO6).

| No. | Compounds              | RI   | EO1   | EO2   | EO3   | EO4  | EO5 | EO6  |
|-----|------------------------|------|-------|-------|-------|------|-----|------|
| 1.  | $\alpha$ -Thujene      | 926  | -     | 1.82  | -     | -    | -   | 0.04 |
| 2.  | $\alpha$ -Pinene       | 932  | -     | 10.75 | 1.13  | 0.89 | -   | 3.77 |
| 3.  | Camphene               | 942  | -     | 0.18  | -     | 0.40 | -   | 0.06 |
| 4.  | Benzaldehyde           | 950  | -     | -     | -     | 4.34 | -   | -    |
| 5.  | Sabinene               | 960  | -     | 13.55 | 38.17 | -    | -   | -    |
| 6.  | $\beta$ -Pinene        | 963  | -     | 19.31 | 8.23  | 0.40 | -   | 0.09 |
| 7.  | Sulcatone              | 969  | 0.04  | -     | -     | -    | -   | -    |
| 8.  | $\beta$ -Myrcene       | 972  | -     | 0.48  | -     | -    | -   | 0.19 |
| 9.  | $\alpha$ -Phellandrene | 985  | -     | 0.36  | 0.11  | -    | -   | 0.30 |
| 10. | 3-Carene               | 990  | -     | 7.49  | -     | -    | -   | -    |
| 11. | $\alpha$ -Terpinene    | 995  | -     | 8.08  | 1.04  | -    | -   | -    |
| 12. | <i>p</i> -Cymene       | 1003 | -     | 2.52  | 2.75  | 1.15 | -   | 0.43 |
| 13. | Limonene               | 1007 | -     | 13.93 | 0.28  | 0.61 | -   | 1.48 |
| 14. | 1,8-Cineole            | 1009 | 0.24  | 0.61  | 0.80  | 0.23 | -   | -    |
| 15. | $\beta$ -Ocimene       | 1023 | 0.08  | -     | -     | -    | -   | -    |
| 16. | $\gamma$ -Terpinene    | 1034 | -     | 0.85  | 10.06 | 0.07 | -   | 0.27 |
| 17. | $\alpha$ -Terpinolene  | 1063 | -     | 0.59  | 0.47  | -    | -   | 0.45 |
| 18. | Linalool               | 1075 | 24.77 | 1.01  | -     | 1.83 | -   | 1.21 |
| 19. | Limona ketone          | 1108 | -     | -     | -     | -    | -   | 0.23 |
| 20. | Dihydrolinalool        | 1109 | 0.13  | -     | -     | -    | -   | -    |
| 21. | Camphor                | 1123 | -     | 0.12  | 0.09  | -    | -   | -    |
| 22. | Menthone               | 1132 | -     | 0.29  | -     | -    | -   | -    |
| 23. | Isoborneol             | 1136 | -     | -     | -     | 0.25 | -   | -    |

|     |                                     |      |       |      |       |       |       |       |
|-----|-------------------------------------|------|-------|------|-------|-------|-------|-------|
| 24. | Acetic acid,<br>phenylmethyl ester  | 1143 | -     | -    | -     | 0.96  | -     | -     |
| 25. | dl-Menthol                          | 1152 | 0.23  | 0.32 | -     | -     | -     | -     |
| 26. | Terpinen-4-ol                       | 1158 | -     | 1.03 | 35.90 | 0.10  | -     | -     |
| 27. | $\alpha$ -Terpineol                 | 1173 | 1.30  | 0.08 | 0.39  | -     | -     | -     |
| 28. | Estragole                           | 1183 | 69.52 | -    | -     | -     | -     | -     |
| 29. | Citronellol                         | 1213 | -     | 0.23 | -     | -     | -     | -     |
| 30. | Nerol                               | 1214 | -     | -    | -     | -     | -     | 3.66  |
| 31. | $\alpha$ -Citral                    | 1228 | 0.22  | -    | -     | -     | -     | -     |
| 32. | Carvone                             | 1231 | -     | 0.30 | -     | -     | -     | -     |
| 33. | Chavicol                            | 1240 | -     | -    | -     | -     | 0.06  | -     |
| 34. | Geraniol                            | 1242 | -     | 0.19 | -     | -     | -     | 0.08  |
| 35. | $\beta$ -Citral                     | 1261 | 0.30  | -    | -     | -     | -     | -     |
| 36. | Cinnamaldehyde                      | 1271 | -     | -    | -     | 74.93 | -     | -     |
| 37. | Safrole                             | 1283 | -     | -    | -     | 0.06  | -     | -     |
| 38. | $\alpha$ -Cubebene                  | 1348 | -     | 0.35 | -     | -     | -     | 0.27  |
| 39. | Eugenol                             | 1358 | -     | 0.96 | -     | 3.10  | 85.14 | 0.09  |
| 40. | Neryl acetate                       | 1365 | -     | -    | -     | -     | -     | 18.15 |
| 41. | Copaene                             | 1378 | -     | 3.74 | -     | -     | 0.11  | 0.65  |
| 42. | Geranyl acetate                     | 1385 | -     | -    | -     | -     | -     | 0.11  |
| 43. | Germacrene D                        | 1393 | -     | 0.23 | -     | -     | -     | -     |
| 44. | Vanillin                            | 1400 | -     | -    | -     | 0.24  | -     | -     |
| 45. | Longifolene                         | 1409 | -     | 0.98 | -     | -     | -     | 0.34  |
| 46. | $\alpha$ -Gurjunene                 | 1414 | -     | -    | -     | 0.13  | -     | -     |
| 47. | Caryophyllene                       | 1425 | 0.32  | 7.15 | -     | 0.15  | 10.20 | 21.48 |
| 48. | $\beta$ -Cubebene                   | 1435 | -     | -    | -     | -     | -     | 0.17  |
| 49. | $\alpha$ -Bergamotene               | 1441 | 0.52  | -    | -     | -     | -     | 1.33  |
| 50. | Cinnamyl acetate                    | 1450 | -     | -    | -     | 0.05  | -     | -     |
| 51. | $\alpha$ -Himachalene               | 1457 | -     | -    | -     | -     | -     | 5.34  |
| 52. | $\alpha$ -Humulene                  | 1460 | 0.17  | 0.23 | 0.07  | -     | 2.64  | 3.08  |
| 53. | $\beta$ -Farnesene                  | 1463 | 0.18  | -    | -     | -     | -     | -     |
| 54. | $\gamma$ -Himachalene               | 1487 | -     | -    | -     | -     | -     | 3.34  |
| 55. | $\alpha$ -Cedrene                   | 1490 | -     | -    | -     | -     | -     | 0.83  |
| 56. | Germacrene                          | 1490 | 0.26  | -    | -     | -     | -     | -     |
| 57. | $\beta$ -Himachalene                | 1512 | -     | -    | -     | -     | -     | 13.34 |
| 58. | $\beta$ -Bisabolene                 | 1517 | 0.06  | -    | -     | -     | -     | 0.19  |
| 59. | Calamenene                          | 1532 | -     | -    | 0.16  | -     | -     | -     |
| 60. | $\delta$ -Cadinene                  | 1533 | -     | 0.59 | -     | -     | 0.23  | 0.30  |
| 61. | Acetylcugenol                       | 1536 | -     | -    | -     | 0.05  | 0.21  | -     |
| 62. | $\alpha$ -Bisabolene                | 1552 | 1.43  | -    | -     | -     | -     | 0.70  |
| 63. | Elemol                              | 1559 | -     | -    | -     | -     | -     | 0.16  |
| 64. | Nerolidol                           | 1573 | -     | -    | -     | -     | -     | 0.30  |
| 65. | <i>p</i> -<br>Methoxycinnamaldehyde | 1576 | 0.22  | -    | -     | -     | -     | -     |
| 66. | Caryophyllene oxide                 | 1593 | -     | 0.11 | -     | -     | 0.82  | 0.74  |
| 67. | Longiborneol                        | 1606 | -     | -    | -     | -     | -     | 0.16  |
| 68. | Humulene epoxide                    | 1619 | -     | -    | -     | -     | 0.10  | -     |
| 69. | $\gamma$ -Eudesmol                  | 1640 | -     | -    | -     | -     | -     | 0.43  |
| 70. | Thujopsene                          | 1647 | -     | -    | -     | -     | -     | 0.19  |
| 71. | $\alpha$ -Cedrene                   | 1656 | -     | -    | -     | -     | -     | 0.56  |
| 72. | $\beta$ -Eudesmol                   | 1658 | -     | -    | -     | -     | -     | 0.34  |

|              |                     |      |               |              |              |              |              |              |
|--------------|---------------------|------|---------------|--------------|--------------|--------------|--------------|--------------|
| 73.          | Ascabin             | 1764 | -             | 0.07         | -            | 9.01         | -            | -            |
| 74.          | $\alpha$ -Atlantone | 1775 | -             | -            | -            | -            | -            | 4.76         |
| <b>Total</b> |                     |      | <b>100.00</b> | <b>98.52</b> | <b>99.64</b> | <b>98.96</b> | <b>99.50</b> | <b>89.62</b> |

**Table S3.** Chemical compositions (%) of the essential oils of fennel (EO7), garden angelica (EO8), hyssop (EO9), lavender (EO10), lemon (EO11), and myrtle (EO12).

| No. | Compounds             | RI   | EO7  | EO8   | EO9   | EO10  | EO11  | EO12  |
|-----|-----------------------|------|------|-------|-------|-------|-------|-------|
| 1.  | $\alpha$ -Thujene     | 926  | -    | 1.64  | 0.37  | -     | -     | 0.31  |
| 2.  | $\alpha$ -Pinene      | 932  | 0.24 | 13.27 | 1.01  | 1.36  | 1.41  | 35.47 |
| 3.  | Camphene              | 942  | -    | 8.72  | 0.17  | 0.07  | 0.17  | 0.44  |
| 4.  | Sabinene              | 960  | -    | 1.68  | 1.97  | -     | 0.31  | -     |
| 5.  | $\beta$ -Pinene       | 963  | -    | 0.80  | 13.16 | 0.63  | 1.11  | 1.02  |
| 6.  | Dihydrocamphene       | 963  | 0.04 | -     | -     | -     | -     | -     |
| 7.  | 3-Octanone            | 968  | -    | -     | -     | 0.65  | -     | -     |
| 8.  | $\beta$ -Myrcene      | 972  | -    | 3.54  | 1.51  | 0.30  | 1.54  | 0.24  |
| 9.  | 3-Octanol             | 975  | -    | -     | -     | 0.15  | -     | -     |
| 10. | Octanal               | 982  | -    | -     | -     | -     | 0.11  | -     |
| 11. | $\alpha$ -Phelandren  | 985  | -    | 4.53  | -     | -     | -     | -     |
| 12. | 3-Carene              | 990  | -    | 4.59  | -     | 0.43  | 4.11  | 8.80  |
| 13. | $\alpha$ -Terpinene   | 995  | -    | -     | 0.38  | -     | -     | 0.22  |
| 14. | <i>p</i> -Cymene      | 1003 | 0.18 | 2.37  | 0.27  | 1.65  | 0.28  | 2.41  |
| 15. | Limonene              | 1007 | 2.13 | -     | -     | 2.72  | 79.72 | 0.56  |
| 16. | $\beta$ -Phelandren   | 1007 | -    | 41.57 | 5.58  | -     | -     | -     |
| 17. | 1,8-Cineole           | 1009 | -    | -     | 0.47  | 1.13  | -     | 19.58 |
| 18. | $\alpha$ -Ocimene     | 1013 | -    | 0.37  | 0.13  | -     | -     | -     |
| 19. | $\beta$ -Ocimene      | 1023 | -    | 0.84  | 0.47  | 0.04  | -     | -     |
| 20. | $\gamma$ -Terpinene   | 1034 | 0.07 | 0.20  | 0.64  | -     | 0.12  | 1.13  |
| 21. | Linalool oxide        | 1048 | -    | -     | -     | 0.59  | -     | -     |
| 22. | $\alpha$ -Terpinolene | 1063 | 0.05 | 0.28  | 0.19  | -     | 0.45  | 0.79  |
| 23. | Phenone               | 1064 | 1.24 | -     | -     | -     | -     | -     |
| 24. | Linalool              | 1075 | -    | -     | 2.97  | 23.88 | 0.82  | 6.28  |
| 25. | $\beta$ -Thujone      | 1082 | -    | -     | 0.11  | -     | -     | -     |
| 26. | cis-Limonene oxide    | 1111 | -    | -     | -     | -     | 0.32  | -     |
| 27. | trans-Limonene oxide  | 1115 | -    | -     | -     | -     | 0.11  | -     |
| 28. | Camphor               | 1123 | 0.06 | -     | 0.10  | 2.82  | -     | 0.32  |
| 29. | Menthone              | 1132 | -    | -     | -     | -     | -     | 0.15  |
| 30. | Isoborneol            | 1136 | -    | -     | -     | 1.73  | 0.09  | -     |
| 31. | trans-Pinocamphone    | 1141 | -    | -     | 7.44  | -     | -     | -     |
| 32. | endo-Borneol          | 1145 | -    | -     | -     | 0.12  | -     | -     |
| 33. | dl-Menthol            | 1152 | -    | -     | -     | -     | -     | 0.27  |
| 34. | Isononyl acetate      | 1155 | -    | -     | -     | 10.05 | -     | -     |
| 35. | Terpinen-4-ol         | 1158 | -    | 0.19  | -     | -     | -     | 0.85  |
| 36. | cis-Pinocamphone      | 1159 | -    | -     | 27.42 | -     | -     | -     |
| 37. | Cryptone              | 1168 | -    | 1.00  | -     | -     | -     | -     |
| 38. | $\alpha$ -Terpineol   | 1173 | -    | -     | 0.18  | 1.71  | 1.47  | 5.02  |
| 39. | $\gamma$ -Terpineol   | 1180 | -    | -     | -     | 0.27  | -     | 0.88  |
| 40. | Estragole             | 1183 | 2.97 | -     | 4.13  | -     | -     | -     |
| 41. | Decanal               | 1188 | -    | -     | -     | -     | 0.20  | -     |
| 42. | Carveol               | 1203 | -    | -     | -     | -     | 0.10  | -     |
| 43. | Citronellol           | 1213 | -    | -     | -     | -     | 0.07  | -     |

|     |                            |      |       |      |      |       |      |      |
|-----|----------------------------|------|-------|------|------|-------|------|------|
| 44. | Phenyl acetate             | 1220 | 0.12  | -    | -    | -     | -    | -    |
| 45. | Cumaldehyde                | 1227 | -     | 0.22 | -    | -     | -    | -    |
| 46. | $\alpha$ -Citral           | 1228 | -     | -    | -    | -     | 1.49 | -    |
| 47. | Carvone                    | 1231 | -     | -    | -    | -     | 0.20 | 0.42 |
| 48. | Geraniol                   | 1242 | -     | -    | 0.21 | -     | 0.10 | 0.40 |
| 49. | Anisaldehyde               | 1243 | 0.72  | -    | -    | -     | -    | -    |
| 50. | Linalyl acetate            | 1246 | -     | -    | -    | 25.33 | -    | 0.87 |
| 51. | $\beta$ -Citral            | 1261 | -     | -    | -    | -     | 1.75 | -    |
| 52. | Borneol acetate            | 1279 | -     | 0.47 | -    | 1.84  | -    | -    |
| 53. | Cuminol                    | 1282 | -     | 0.14 | -    | -     | -    | -    |
| 54. | Anethole                   | 1288 | 88.42 | -    | -    | -     | -    | -    |
| 55. | Limonene dioxide           | 1299 | -     | -    | -    | -     | -    | 1.52 |
| 56. | $\alpha$ -Terpinyl acetate | 1349 | -     | -    | -    | 12.58 | -    | -    |
| 57. | Citronellol acetate        | 1351 | -     | -    | -    | -     | 0.40 | -    |
| 58. | Eugenol                    | 1358 | -     | -    | 0.21 | -     | -    | 0.61 |
| 59. | Neryl acetate              | 1365 | -     | -    | -    | 0.29  | -    | -    |
| 60. | Cyclosativene              | 1368 | -     | 0.19 | -    | -     | -    | -    |
| 61. | Copaene                    | 1378 | -     | 2.08 | 0.19 | 0.11  | -    | 0.76 |
| 62. | Geranyl acetate            | 1385 | -     | -    | -    | 0.05  | 0.10 | 0.60 |
| 63. | Anisic ketone              | 1385 | 0.10  | -    | -    | -     | -    | -    |
| 64. | $\beta$ -Bourbonene        | 1387 | -     | -    | 2.19 | -     | -    | -    |
| 65. | $\beta$ -Elemene           | 1395 | -     | 0.31 | 1.40 | -     | -    | -    |
| 66. | Methyl eugenol             | 1408 | -     | -    | 0.26 | -     | -    | -    |
| 67. | Longifolene                | 1409 | -     | -    | -    | 0.06  | -    | 0.88 |
| 68. | $\alpha$ -Gurjunene        | 1414 | -     | -    | 0.27 | -     | -    | -    |
| 69. | Caryophyllene              | 1425 | -     | -    | 3.35 | 5.21  | 1.98 | 3.79 |
| 70. | $\beta$ -Cubebene          | 1435 | -     | 0.36 | 0.24 | -     | -    | -    |
| 71. | $\alpha$ -Bergamotene      | 1441 | -     | -    | 0.32 | -     | -    | -    |
| 72. | Coumarin                   | 1441 | -     | -    | -    | 1.43  | -    | -    |
| 73. | $\alpha$ -Guaiene          | 1444 | -     | -    | 0.87 | -     | -    | -    |
| 74. | $\alpha$ -Humulene         | 1460 | -     | 0.41 | 1.09 | 0.57  | -    | 0.49 |
| 75. | Aromandendrene             | 1468 | -     | -    | 1.33 | -     | -    | -    |
| 76. | Germacrene D               | 1490 | -     | -    | 4.50 | -     | -    | -    |
| 77. | Curcumene                  | 1490 | -     | 0.82 | -    | -     | -    | -    |
| 78. | Zingiberene                | 1504 | -     | 0.59 | -    | -     | -    | -    |
| 79. | Bicyclogermacrene          | 1506 | -     | -    | 2.19 | -     | -    | -    |
| 80. | $\alpha$ -Muurolene        | 1509 | -     | 0.65 | -    | -     | -    | -    |
| 81. | $\alpha$ -Bulnesene        | 1515 | -     | -    | 2.27 | -     | -    | -    |
| 82. | $\beta$ -Bisabolene        | 1517 | -     | 0.48 | -    | -     | -    | -    |
| 83. | $\gamma$ -Cadinene         | 1523 | -     | -    | 1.10 | -     | -    | -    |
| 84. | $\delta$ -Cadinene         | 1533 | -     | 0.40 | 0.24 | 0.07  | -    | -    |
| 85. | $\alpha$ -Copaen-11-ol     | 1551 | -     | 0.28 | -    | -     | -    | -    |
| 86. | Elemol                     | 1559 | -     | -    | 1.22 | -     | -    | -    |
| 87. | Spathulenol                | 1587 | -     | 0.59 | 0.37 | -     | -    | -    |
| 88. | Caryophyllene oxide        | 1593 | -     | -    | 0.87 | 0.21  | 0.33 | -    |
| 89. | Ledol                      | 1613 | -     | -    | 0.10 | -     | -    | -    |
| 90. | 3-Decanolide               | 1636 | -     | 0.89 | -    | -     | -    | -    |
| 91. | $\gamma$ -Eudesmol         | 1640 | -     | -    | 0.20 | -     | -    | -    |
| 92. | T-Muurolol                 | 1648 | -     | -    | 1.34 | -     | -    | -    |
| 93. | $\beta$ -Eudesmol          | 1658 | -     | -    | 0.23 | -     | -    | -    |
| 94. | $\alpha$ -Eudesmol         | 1661 | -     | -    | 0.21 | -     | -    | -    |

|              |                 |      |              |              |              |              |              |              |
|--------------|-----------------|------|--------------|--------------|--------------|--------------|--------------|--------------|
| 95.          | Pentadecanolide | 1822 | -            | 0.31         | -            | -            | -            | -            |
| <b>Total</b> |                 |      | <b>96.35</b> | <b>94.79</b> | <b>95.44</b> | <b>98.05</b> | <b>98.85</b> | <b>95.11</b> |

**Table S4.** Chemical compositions (%) of the essential oils of oregano (EO13), rosemary (EO14), sage (EO15), thyme (EO16), winter savory (EO17), and yarrow (EO18).

| No. | Compounds                  | RI   | EO13  | EO14  | EO15  | EO16  | EO17  | EO18  |
|-----|----------------------------|------|-------|-------|-------|-------|-------|-------|
| 1.  | Santolina triene           | 912  | -     | -     | -     | -     | -     | 0.21  |
| 2.  | $\alpha$ -Thujene          | 926  | -     | 0.12  | -     | 0.06  | 1.79  | 0.55  |
| 3.  | $\alpha$ -Pinene           | 932  | 0.29  | 28.23 | -     | 0.40  | 1.06  | 2.28  |
| 4.  | Camphene                   | 942  | 0.05  | 3.44  | -     | 0.07  | 0.43  | 0.20  |
| 5.  | Sabinene                   | 960  | -     | -     | -     | -     | -     | 22.70 |
| 6.  | 1-Octen-3-ol               | 962  | -     | -     | -     | -     | 1.37  | -     |
| 7.  | $\beta$ -Pinene            | 963  | 0.19  | 3.16  | -     | 1.28  | -     | 11.47 |
| 8.  | $\beta$ -Myrcene           | 972  | 0.09  | 0.16  | 0.96  | 0.64  | 1.33  | 0.60  |
| 9.  | $\alpha$ -Phelandren       | 985  | -     | 0.06  | 0.35  | 0.18  | 0.29  | 0.10  |
| 10. | 3-Carene                   | 990  | -     | 0.22  | -     | -     | 0.08  | -     |
| 11. | $\alpha$ -Terpinene        | 995  | -     | -     | -     | -     | 2.26  | 0.63  |
| 12. | <i>p</i> -Cymene           | 1003 | 1.61  | 2.04  | 0.16  | 40.91 | 15.73 | 0.37  |
| 13. | Limonene                   | 1007 | 0.14  | 3.43  | 0.94  | 0.39  | 0.59  | -     |
| 14. | $\beta$ -Phelandren        | 1007 | -     | -     | -     | -     | -     | 1.00  |
| 15. | 1,8-Cineole                | 1009 | 0.23  | 11.54 | -     | 0.06  | 0.33  | 3.06  |
| 16. | $\alpha$ -Ocimene          | 1013 | -     | -     | 0.29  | -     | -     | 0.20  |
| 17. | <i>o</i> -Cymene           | 1015 | -     | -     | -     | 0.07  | -     | -     |
| 18. | $\beta$ -Ocimene           | 1023 | -     | -     | -     | -     | -     | 0.51  |
| 19. | $\gamma$ -Terpinene        | 1034 | 0.13  | 0.34  | -     | 10.37 | 11.43 | -     |
| 20. | Artemisia ketone           | 1036 | -     | -     | -     | -     | -     | 7.37  |
| 21. | Artemisia alcohol          | 1057 | -     | -     | -     | -     | -     | 0.17  |
| 22. | $\alpha$ -Terpinolene      | 1063 | -     | 0.36  | 0.49  | -     | 0.16  | 0.27  |
| 23. | Linalool                   | 1075 | 0.18  | 1.03  | 23.95 | 2.18  | 1.06  | 0.37  |
| 24. | iso-Phenol                 | 1085 | -     | 0.46  | -     | -     | -     | -     |
| 25. | Dihydrolinalool            | 1109 | -     | -     | 0.32  | -     | -     | -     |
| 26. | Camphor                    | 1123 | 0.10  | 1.23  | -     | -     | -     | 0.32  |
| 27. | Borneol                    | 1139 | -     | 24.87 | -     | -     | -     | -     |
| 28. | endo-Borneol               | 1145 | -     | 0.31  | 0.10  | -     | 1.26  | -     |
| 29. | Terpinen-4-ol              | 1158 | -     | 0.65  | -     | 0.76  | 0.81  | 2.11  |
| 30. | $\alpha$ -Terpineol        | 1173 | 0.24  | 11.86 | 4.77  | -     | 0.18  | 0.33  |
| 31. | $\gamma$ -Terpineol        | 1180 | -     | 1.57  | 0.66  | -     | -     | -     |
| 32. | Nerol                      | 1214 | -     | -     | 0.08  | -     | -     | -     |
| 33. | Geraniol                   | 1242 | -     | 0.45  | -     | -     | -     | -     |
| 34. | Linalyl acetate            | 1246 | -     | 0.21  | 56.41 | -     | -     | -     |
| 35. | Borneol acetate            | 1279 | -     | 1.30  | -     | -     | -     | -     |
| 36. | Lavandulyl acetate         | 1283 | -     | -     | -     | -     | -     | 0.42  |
| 37. | Thymol                     | 1286 | 7.74  | -     | -     | 40.36 | 0.28  | -     |
| 38. | Carvacrol                  | 1299 | 81.00 | -     | -     | 1.44  | 50.45 | 0.44  |
| 39. | $\alpha$ -Terpinyl acetate | 1349 | -     | 1.23  | -     | -     | -     | -     |
| 40. | Neryl acetate              | 1365 | -     | -     | 1.51  | -     | 0.10  | 0.32  |
| 41. | Carvacryl acetate          | 1373 | -     | -     | -     | -     | 0.44  | -     |
| 42. | Copaene                    | 1378 | 0.13  | -     | -     | -     | 0.13  | 0.17  |
| 43. | Geranyl acetate            | 1385 | -     | -     | 2.29  | -     | -     | -     |
| 44. | $\beta$ -Bourbonene        | 1387 | -     | -     | -     | -     | 0.11  | 0.55  |

|              |                     |      |              |              |              |              |              |              |
|--------------|---------------------|------|--------------|--------------|--------------|--------------|--------------|--------------|
| 45.          | $\beta$ -Curcumene  | 1407 | -            | -            | -            | -            | -            | 0.11         |
| 46.          | Longifolene         | 1409 | -            | 0.25         | 0.10         | -            | -            | -            |
| 47.          | Caryophyllene       | 1425 | 6.69         | 0.63         | 2.13         | -            | 2.68         | 11.69        |
| 48.          | $\alpha$ -Humulene  | 1460 | 0.66         | 0.07         | 0.35         | -            | 0.10         | 1.73         |
| 49.          | $\beta$ -Farnesene  | 1463 | -            | -            | -            | -            | -            | 0.14         |
| 50.          | $\gamma$ -Muurolene | 1485 | -            | -            | -            | -            | 0.19         | -            |
| 51.          | Germacrene D        | 1490 | -            | -            | -            | -            | 1.39         | 14.10        |
| 52.          | $\beta$ -Selinene   | 1495 | -            | -            | -            | -            | 0.14         | 0.20         |
| 53.          | Zingiberene         | 1504 | -            | -            | -            | -            | -            | 0.92         |
| 54.          | Bicyclogermacrene   | 1506 | -            | -            | -            | -            | 0.57         | 0.54         |
| 55.          | Farnesene           | 1517 | -            | -            | -            | -            | -            | 0.25         |
| 56.          | $\beta$ -Bisabolene | 1517 | -            | -            | -            | -            | 1.44         | -            |
| 57.          | $\gamma$ -Cadinene  | 1523 | -            | -            | -            | -            | 0.14         | -            |
| 58.          | Calamenene          | 1532 | -            | -            | 0.72         | -            | -            | -            |
| 59.          | $\delta$ -Cadinene  | 1533 | 0.09         | -            | -            | -            | 0.30         | 0.55         |
| 60.          | Cadina-1,4-diene    | 1541 | -            | -            | 0.07         | -            | -            | -            |
| 61.          | Nerolidol           | 1573 | -            | -            | -            | -            | -            | 0.32         |
| 62.          | Caryophyllene oxide | 1593 | 0.31         | -            | 0.41         | -            | 0.33         | 1.81         |
| 63.          | $\beta$ -Eudesmol   | 1658 | -            | -            | -            | -            | -            | 0.13         |
| 64.          | Chamazulene         | 1734 | -            | -            | -            | -            | -            | 6.70         |
| <b>Total</b> |                     |      | <b>99.87</b> | <b>99.19</b> | <b>97.06</b> | <b>99.17</b> | <b>98.94</b> | <b>95.91</b> |
